# Supplementary material
Source: publisher site journal article supplement (https://www.dovepress.com/article/382843)
Supplement: Supplementary file 1 [file get_supplementary_file.php]

Supplementary Table 1**.** Clinicopathological parameters of 18 ccRCC patients.

| Variables | validation set |
| --- | --- |
| 18 pairs of ccRCC and adjacent normal tissues |
| Age (years mean) | 50 |
| Gender (no.) male, female, | 18 |
| Pathological T stage no.  T1  T2  T3  T4 | 8  4  5  1 |
| Pathological N stage no.  N0  N1 | 17  1 |
| Pathological M stage no.  M0  M1 | 17  1 |
| Pathological grade no.  G1  G2  G3  G4 | 4  11  3 |
| AJCC TNM stage no.  I  II  III  VI | 8  4  5  1 |
|  | |
